# Supplementary material for: Superficial zone cellularity is deficient in mice lacking lubricin: a stereoscopic analysis
Source: PubMed Central journal article supplement (PMC5477516; doi:10.1186/s13075-016-0967-4), 2016-03-14
Supplement: 13075_2016_967_MOESM1_ESM.pdf [file 13075_2016_967_MOESM1_ESM.pdf]

**Additional file1: Table S1. *Prg4* mutant mice utilization for chondrocyte volume fraction determination of the medial and lateral femoral condyle by genotype, sex and knee laterality.**

| <i>Prg4</i> +/+ (N=20 knees) |     |   |   | <i>Prg4</i> +/- (N=18 knees) |     |   |   | <i>Prg4</i> -/- (N=30 knees) |     |   |   |
|------------------------------|-----|---|---|------------------------------|-----|---|---|------------------------------|-----|---|---|
| #                            | Sex | L | R | #                            | Sex | L | R | #                            | Sex | L | R |
| 2863                         | ♂   |   | • | 2880                         | ♂   |   | • | 2851                         | ♂   | • | • |
| 2864                         | ♂   | • |   | 2881                         | ♂   | • |   | 2852                         | ♂   |   | • |
| 2865                         | ♂   |   | • | 2886                         | ♀   | • |   | 2872                         | ♂   | • |   |
| 2888                         | ♀   | • |   | 3012                         | ♂   | • | • | 3020                         | ♂   | • | • |
| 3034                         | ♀   | • | • | 3013                         | ♂   | • | • | 3021                         | ♂   | • | • |
| 3010                         | ♀   | • | • | 3014                         | ♂   |   | • | 3022                         | ♂   | • | • |
| 3011                         | ♀   |   | • | 3016                         | ♂   | • | • | 3023                         | ♂   | • | • |
| 3015                         | ♂   | • | • | 3028                         | ♂   | • | • | 3009                         | ♀   | • | • |
| 2870                         | ♀   | • | • | 3029                         | ♂   | • | • | 3024                         | ♀   | • | • |
| 2869                         | ♀   |   | • | 57                           | ♀   | • | • | 3026                         | ♂   | • | • |
| 1                            | ♂   | • | • | 63                           | ♀   | • | • | 17                           | ♀   | • | • |
| 2                            | ♂   | • | • |                              |     |   |   | 19                           | ♀   | • | • |
| 3                            | ♂   | • | • |                              |     |   |   | 3095                         | ♀   | • | • |
|                              |     |   |   |                              |     |   |   | 65                           | ♀   | • | • |
|                              |     |   |   |                              |     |   |   | 3102                         | ♀   | • | • |
|                              |     |   |   |                              |     |   |   | 3103                         | ♀   | • | • |
